# Supplementary material for: Curcuma longa Extract Exerts a Myorelaxant Effect on the Ileum and Colon in a Mouse Experimental Colitis Model, Independent of the Anti-Inflammatory Effect
Source: PLoS One. 2012 Sep 12;7(9):e44650. doi: 10.1371/journal.pone.0044650 (PMC3440350; doi:10.1371/journal.pone.0044650)
Supplement: Table S3 — Potency of Chrabacol and Atropine on isolated mice tissues. (DOC) [file pone.0044650.s006.doc]

**Table S3.** Potency of Chrabacol and Atropine on isolated mice tissues.

| **ileum** | **CCh** | **pEC50*a*** | 6.63 ± 0.04 |
| --- | --- | --- | --- |
| **Atropine** | **p*A*2*b*** | 8.89 ± 0.03 |
| **colon** | **CCh** | **pEC50*a*** | 6.08 ± 0.01 |
| **Atropine** | **p*A*2b** | 8.89 ± 0.01 |

*a* pEC50 = –log EC50. EC50 values are the means ± SE of at least four independent experiments and were calculated by a non linear regression curve-fitting computer program [SR5]. *b*p*A*2 values ± SE were calculated from Schild plots [SR6] constrained to slope –1.0 [SR5]. p*A*2 is the positive value of the intercept of the line derived by plotting log (DR – 1) vs log [antagonist]. The log (DR – 1) was calculated from three different antagonist concentrations, and each concentration was tested from four to six times. Dose-ratio (DR) values represent the ratio of the potency of the agonist carbachol (EC50) in the presence of the antagonist and in its absence. Parallelism of concentration–response curves was checked by linear regression, and slopes were tested for significance (p < 0.05).
